# Supplementary material for: Content-Based Image Retrieval System for Pulmonary Nodules Using Optimal Feature Sets and Class Membership-Based Retrieval
Source: Springer Nature journal article supplement (doi:10.1007/s10278-018-0136-1), 2018-10-25
Supplement: MOESM1 [file 16225946]

We have obtained the same set of results for LIDC/IDRI database using City block and Euclidean distance (Refer Table 1-6 and Fig. 1-2). The trend of results using Canberra distance is same for City block and Euclidean distance. Moreover, we have obtained and analysed the same set of results for PGIMER-IITKGP database, and we found that the trend of results is the same (Refer Table 7-15 and Fig 3-5).

**Table 1:** Normalised standard deviation w.r.t. average precision of CBIR techniques for LIDC/IDRI database using City block distance at Ntop=7

| **Methods** | **Average (μ)** | **Standard Deviation (σ)** |  |
| --- | --- | --- | --- |
| **Dhara *et al.*** | 82.45 | 26.51 | 0.32 |
| **SDR with optimal features** | 82.95 | 27.06 | 0.33 |
| **CCBR** | 87.83 | 32.73 | 0.37 |
| **CMR with all features** | 87.74 | 31.26 | 0.36 |
| **CMR with optimal features** | 88.17 | 29.65 | 0.34 |

**Table 2:** p-value analysis of the precision of CBIR techniques for the LIDC/IDRI database using City block distance at the Ntop = 7. (The p-values with the green text indicates statistically significant values and the p-values with red text indicates statistically insignificant values.)

| **Methods** | **Dhara *et al.*** | **SDR with optimal features** | **CCBR** | **CMR with all features** |
| --- | --- | --- | --- | --- |
| **CMR with optimal features** | 4.22E-04 | 1.27E-03 | 4.78E-01 | 4.77E-01 |
| **CMR with all features** | 6.61E-04 | 1.86E-03 | 5.82E-01 |  |
| **CCBR** | 1.51E-03 | 3.82E-03 |  |  |
| **SDR with optimal features** | 3.79E-01 |  |  |  |

**Table 3:** Precision rank of the SDR and CMR with optimal features and with all features for LIDC/IDRI database using City block distance at Ntop = 7 expressed in terms of percentage of total number of queries.

| **Ranks** | **Higher**  **(%)** | **Equal**  **(%)** | **Lower**  **(%)** |
| --- | --- | --- | --- |
| **SDR with optimal features Vs. SDR with all features** | 18.45 | 65.13 | 16.42 |
| **CMR with optimal features Vs. CMR with all features** | 6.27 | 88.93 | 4.80 |


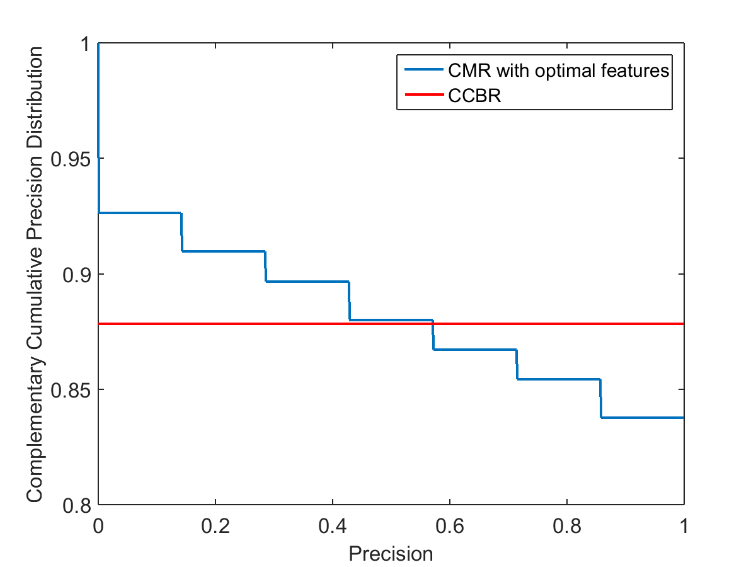


**Fig. 1**: Comparison of CMR techniques with the CCBR technique for LIDC/IDRI database using City block distance at Ntop = 7.

**Table 4:** Normalised standard deviation w.r.t. average precision of CBIR techniques for LIDC/IDRI database using Euclidean distance at Ntop=7

| **Methods** | **Average (μ)** | **Standard Deviation (σ)** |  |
| --- | --- | --- | --- |
| **Dhara *et al.*** | 82.18 | 26.71 | 0.33 |
| **SDR with optimal features** | 83.00 | 26.58 | 0.32 |
| **CCBR** | 87.83 | 32.73 | 0.37 |
| **CMR with all features** | 87.37 | 31.72 | 0.36 |
| **CMR with optimal features** | 87.88 | 29.32 | 0.33 |

**Table 5:** p-value analysis of the precision of CBIR techniques for the LIDC/IDRI database using Euclidean distance at the Ntop = 7. (The p-values with the green text indicates statistically significant values and the p-values with red text indicates statistically insignificant values.)

| **Methods** | **Dhara *et al.*** | **SDR with optimal features** | **CCBR** | **CMR with all features** |
| --- | --- | --- | --- | --- |
| **CMR with optimal features** | 4.31E-04 | 2.11E-03 | 4.78E-01 | 4.54E-01 |
| **CMR with all features** | 9.43E-04 | 4.01E-03 | 5.82E-01 |  |
| **CCBR** | 9.66E-04 | 3.93E-03 |  |  |
| **SDR with optimal features** | 3.07E-01 |  |  |  |

**Table 6:** Precision rank of the SDR and CMR with optimal features and with all features for LIDC/IDRI database using Euclidean distance at Ntop = 7 expressed in terms of percentage of total number of queries.

| **Ranks** | **Higher**  **(%)** | **Equal**  **(%)** | **Lower**  **(%)** |
| --- | --- | --- | --- |
| **SDR with optimal features Vs. SDR with all features** | 19.37 | 65.50 | 15.13 |
| **CMR with optimal features Vs. CMR with all features** | 6.64 | 87.27 | 6.09 |


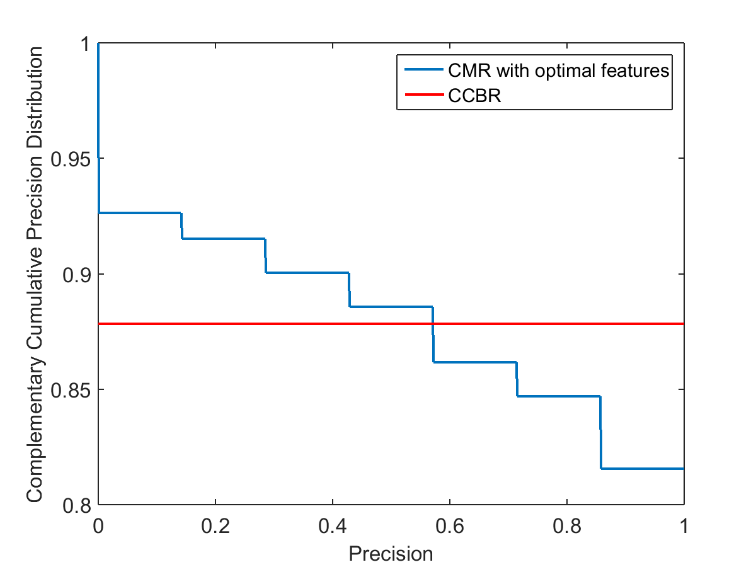


**Fig. 2**: Comparison of CMR techniques with the CCBR technique for LIDC/IDRI database using Euclidean distance at Ntop = 7.

**PGIMER-IITKGP Results:**

**Table 7:** Normalised standard deviation w.r.t. average precision of CBIR techniques for PGIMER-IITKGP database using Canberra distance at Ntop=7

| **Methods** | **Average (μ)** | **Standard Deviation (σ)** |  |
| --- | --- | --- | --- |
| **Dhara *et al.*** | 76.17 | 28.09 | 0.37 |
| **SDR with optimal features** | 79.02 | 27.25 | 0.34 |
| **CCBR** | 83.17 | 37.44 | 0.45 |
| **CMR with all features** | 84.05 | 33.20 | 0.40 |
| **CMR with optimal features** | 85.11 | 32.70 | 0.38 |

**Table 8:** p-value analysis of the precision of CBIR techniques for the PGIMER-IITKGP database using Canberra distance at the Ntop = 7. (The p-values with the green text indicates statistically significant values and the p-values with red text indicates statistically insignificant values.)

| **Methods** | **Dhara *et al.*** | **SDR with optimal features** | **CCBR** | **CMR with all features** |
| --- | --- | --- | --- | --- |
| **CMR with optimal features** | 6.73E-06 | 1.30E-03 | 2.07E-01 | 2.09E-01 |
| **CMR with all features** | 3.98E-04 | 2.08E-02 | 4.84E-01 |  |
| **CCBR** | 8.04E-04 | 2.90E-02 |  |  |
| **SDR with optimal features** | 6.22E-02 |  |  |  |

**Table 9:** Precision rank of the SDR and CMR with optimal features and with all features for PGIMER-IITKGP database using Canberra distance at Ntop = 7 expressed in terms of percentage of total number of queries.

| **Ranks** | **Higher**  **(%)** | **Equal**  **(%)** | **Lower**  **(%)** |
| --- | --- | --- | --- |
| **SDR with optimal features Vs. SDR with all features** | 31.39 | 47.98 | 20.63 |
| **CMR with optimal features Vs. CMR with all features** | 8.74 | 84.08 | 7.17 |


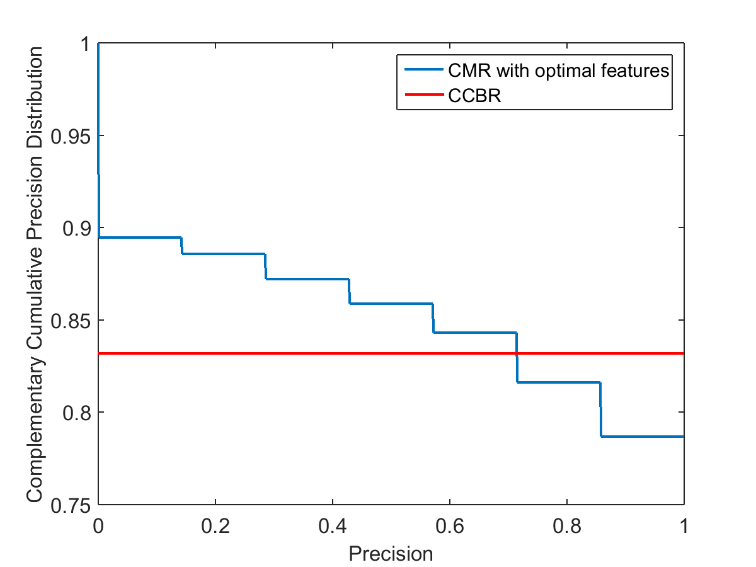


**Fig. 3**: Comparison of CMR techniques with the CCBR technique for PGIMER-IITKGP database using Canberra distance at Ntop = 7.

**Table 10:** Normalised standard deviation w.r.t. average precision of CBIR techniques for PGIMER-IITKGP database using City block distance at Ntop=7

| **Methods** | **Average (μ)** | **Standard Deviation (σ)** |  |
| --- | --- | --- | --- |
| **Dhara *et al.*** | 75.98 | 28.61 | 0.38 |
| **SDR with optimal features** | 78.19 | 26.55 | 0.34 |
| **CCBR** | 83.17 | 37.44 | 0.45 |
| **CMR with all features** | 83.89 | 33.63 | 0.40 |
| **CMR with optimal features** | 84.79 | 32.93 | 0.39 |

**Table 11:** p-value analysis of the precision of CBIR techniques for the PGIMER-IITKGP database using City block distance at the Ntop = 7. (The p-values with the green text indicates statistically significant values and the p-values with red text indicates statistically insignificant values.)

| **Methods** | **Dhara *et al.*** | **SDR with optimal features** | **CCBR** | **CMR with all features** |
| --- | --- | --- | --- | --- |
| **CMR with optimal features** | 1.11E-05 | 5.14E-04 | 2.49E-01 | 2.71E-01 |
| **CMR with all features** | 2.44E-04 | 5.76E-03 | 4.63E-01 |  |
| **CCBR** | 6.43E-04 | 1.09E-02 |  |  |
| **SDR with optimal features** | 1.16E-01 |  |  |  |

**Table 12:** Precision rank of the SDR and CMR with optimal features and with all features for PGIMER-IITKGP database using City block distance at Ntop = 7 expressed in terms of percentage of total number of queries.

| **Ranks** | **Higher**  **(%)** | **Equal**  **(%)** | **Lower**  **(%)** |
| --- | --- | --- | --- |
| **SDR with optimal features Vs. SDR with all features** | 28.03 | 53.81 | 18.16 |
| **CMR with optimal features Vs. CMR with all features** | 8.52 | 83.41 | 8.07 |


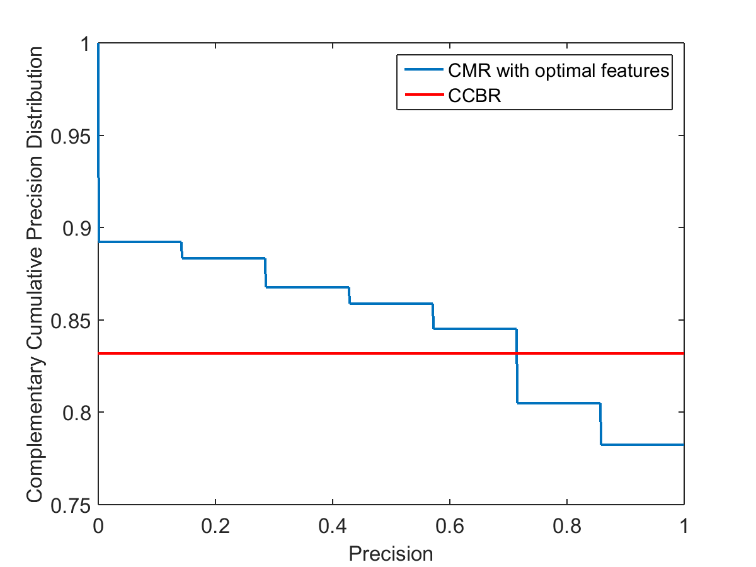


**Fig. 4**: Comparison of CMR techniques with the CCBR technique for PGIMER-IITKGP database using City block distance at Ntop = 7.

**Table 13:** Normalised standard deviation w.r.t. average precision of CBIR techniques for PGIMER-IITKGP database using Euclidean distance at Ntop=7

| **Methods** | **Average (μ)** | **Standard Deviation (σ)** |  |
| --- | --- | --- | --- |
| **Dhara *et al.*** | 76.36 | 28.27 | 0.37 |
| **SDR with optimal features** | 77.74 | 28.44 | 0.37 |
| **CCBR** | 83.17 | 37.44 | 0.45 |
| **CMR with all features** | 84.11 | 33.60 | 0.40 |
| **CMR with optimal features** | 84.56 | 33.25 | 0.39 |

**Table 14:** p-value analysis of the precision of CBIR techniques for the PGIMER-IITKGP database using Euclidean distance at the Ntop = 7. (The p-values with the green text indicates statistically significant values and the p-values with red text indicates statistically insignificant values.)

| **Methods** | **Dhara *et al.*** | **SDR with optimal features** | **CCBR** | **CMR with all features** |
| --- | --- | --- | --- | --- |
| **CMR with optimal features** | 3.93E-05 | 5.16E-04 | 2.81E-01 | 3.26E-01 |
| **CMR with all features** | 3.65E-04 | 3.21E-03 | 4.42E-01 |  |
| **CCBR** | 1.10E-03 | 7.33E-03 |  |  |
| **SDR with optimal features** | 2.34E-01 |  |  |  |

**Table 15:** Precision rank of the SDR and CMR with optimal features and with all features for PGIMER-IITKGP database using Euclidean distance at Ntop = 7 expressed in terms of percentage of total number of queries.

| **Ranks** | **Higher**  **(%)** | **Equal**  **(%)** | **Lower**  **(%)** |
| --- | --- | --- | --- |
| **SDR with optimal features Vs. SDR with all features** | 30.94 | 43.05 | 26.01 |
| **CMR with optimal features Vs. CMR with all features** | 8.07 | 83.86 | 8.07 |


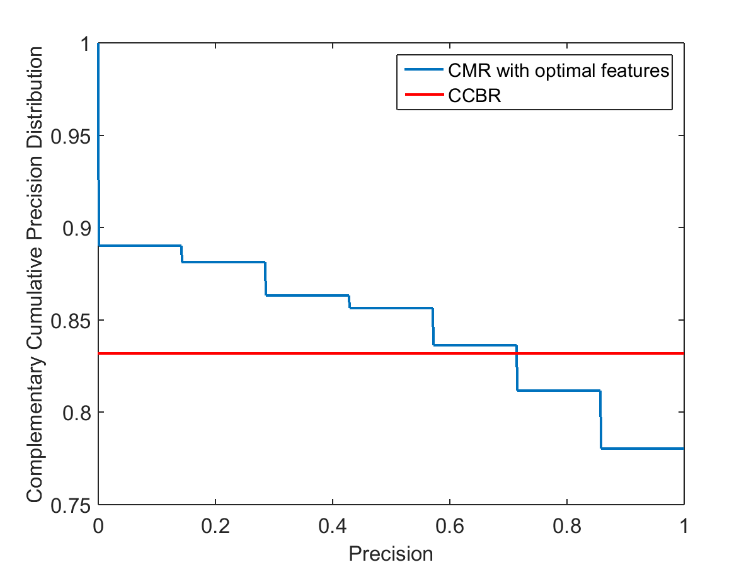


**Fig. 5**: Comparison of CMR techniques with the CCBR technique for PGIMER-IITKGP database using Euclidean distance at Ntop = 7.
